# Supplementary material
Source: HighWire-hosted journal article supplement (https://bmjopen.bmj.com/content/7/10/e017287)
Supplement: inline-supplementary-material-2 [file inline-supplementary-material-2.pdf]

**FORM B Organ Donation Study: Questionnaire for SNOD to document outcome of all approach conversations**

**Record of conversation with (tick all that apply):** spouse or partner    parent or child    brother or sister    grandparent or grandchild    niece or nephew    stepfather or stepmother    half-brother or half-sister    friend of long standing  
 appointed representative    (referred to as 'family' hereafter)

**Age range of deceased person:**    0-18    19-35    36-50    51-70    >71

**What region in Wales did family members/friends come from (tick all that apply):** Isle of Anglesey    Conwy    Gwynedd  
 Denbighshire    Flintshire    Wrexham    Powys    Ceredigion    Pembrokeshire    Carmarthenshire    Swansea  
 Neath Port Talbot    Bridgend    Rhondda Cynon Taff    Merthyr Tydfil    Blaenau    Torfaen    Monmouthshire  
 Caerphilly    Newport    Cardiff    Vale of Glamorgan    Outside of Wales

1. Was a SNOD involved in the donation conversation?

Yes    No

2. Did the patient die in hospital in:

Wales (go to Q3b)    England (go to Q3)

3. For Welsh patients that died in England what was the patient registered decision on ODR?    Opt In    Opt Out  
 Appoint Representative    Not Registered

Would the patient have fitted deemed consent criteria if they had died in Wales?    Yes    No

Did the family think that deemed consent would apply?

Yes    No    Uncertain    Non Applicable (N/A)

Was consent obtained?    Yes    No    N/A

Had the family heard or read about the Act from the media campaign (Radio, TV, newspapers, postal leaflet etc)?

Yes    No    Uncertain    N/A

Were the family positive about the new Act?

Yes    No    Uncertain    N/A (go to Q.19)

3b. For Welsh patients who died in Wales, what was their registered decision on the ODR?    Opt In    Opt Out  
 Appoint Representative    Not Registered

4. If patient was under 18 was their decision recorded on ODR?

Yes    No    Non Applicable (N/A)

5. For patients of any age, did the family know of any other expressed decision?

Yes    No    Uncertain    N/A

6. Did the family agree with the patient's expressed donation decision?    Yes    No    Uncertain    N/A

7. Was there disagreement between one or more family members about the patient's expressed decision?

Yes    No    Uncertain    N/A

8. Was the patient's registered or expressed donation decision supported?    Yes    No    N/A

9. Only for patients who appointed a representative (AR).

Did the AR give consent?    Yes    No

Did the AR support new Act?    Yes    No    Uncertain

Were the family aware of AR?    Yes    No    Uncertain

Did the family agree with the decision of the AR?

Yes    No    Uncertain    N/A

10. Did deemed consent apply?    Yes    No    N/A

11. Did the family agree with the deemed consent of the patient?

Yes    No    N/A

If no, did you feel able to get the family to support the deemed consent?    Yes    No    N/A

12. Was there disagreement within the family and close friends involved in the deemed consent conversation?

Yes    No    Uncertain    N/A

If yes, did you feel able to get the group to support the deemed consent?    Yes    No    N/A

13. Was consent obtained?    Yes    No    N/A

14. Who consented?    family member    friend    other    N/A

15. Had the family heard or read about the Act from the media campaign (Radio, TV, newspapers, postal leaflet etc)?

Yes    No    Uncertain    N/A

16. Did the family have a correct understanding of the Act BEFORE you spoke to them?    Yes    No    Uncertain    N/A

17. Did the family have a correct understanding of the Act AFTER you spoke to them?    Yes    No    Uncertain    N/A

18. Had the new Act changed the family views of organ donation?

Yes    No    Uncertain    N/A

If yes, were they positive about the new Act?    Yes    No

19. Did any person suggest that they would register their decision in light of your conversation?

Yes    No    N/A

If yes, would they:    Opt in     Opt out   
 Appoint Representative    Do nothing

20. Has this Act influenced your approach conversation with this family?    Yes    No    Uncertain    N/A

Anything else that could be helpful (e.g. Was there a pre-approach, a complaint or anything in this case that impacted upon you getting consent under the new law?)

Return by email to [organdonationstudys@nhsbt.nhs.uk](mailto:organdonationstudys@nhsbt.nhs.uk) (for South Wales team) as soon as possible.
